# Supplementary material for: Is Thermosensing Property of RNA Thermometers Unique?
Source: PubMed Central journal article supplement (PMC2896394; doi:10.1371/journal.pone.0011308), 2010-07-02
Supplement: pone.0011308.s002.pdf [file pone.0011308.s002.pdf]

Aeromonas hydrophila ATCC7966  
Alcanivorax borkumensis SK2  
Alcanivorax borkumensis SK2  
Baumannia cicadellinicola  
Buchnera aphidicola (Baizongia pistaciae)  
Buchnera aphidicola Sg  
Buchnera sp. APS  
Candidatus Blochmannia floridanus  
Candidatus Blochmannia pennsylvanicus str. BPEN  
Candidatus Pelagibacter ubique HTCC1062  
Chromohalobacter salexigens DSM 3043  
Colwellia psychrerythraea 34H  
Erwinia carotovora atroseptica SCRI1043  
Escherichia coli 536  
Escherichia coli CFT073  
Escherichia coli O157:H7 EDL933  
Escherichia coli UTI89  
Escherichia coli W3110  
Francisella tularensis subsp. holarctica  
Francisella tularensis subsp. tularensis FSC 198  
Haemophilus ducreyi 35000HP  
Haemophilus influenzae 86 028NP  
Haemophilus influenzae KW20 Rd  
Haemophilus somnus 129PT  
Hahella chejuensis KCTC 2396  
Hahella chejuensis KCTC 2396  
Idiomarina loihiensis L2TR  
Idiomarina loihiensis L2TR  
Legionella pneumophila Lens  
Legionella pneumophila Paris  
Legionella pneumophila Philadelphia 1  
Legionella pneumophila Philadelphia 1  
Mannheimia succiniciproducens MBEL55E  
Methylococcus capsulatus Bath  
Nitrosococcus oceani ATCC 19707  
Pasteurella multocida PM70  
Pasteurella multocida PM70  
Photobacterium profundum SS9  
Photobacterium luminescens TT01  
Pseudoalteromonas atlantica T6c  
Pseudoalteromonas haloplanktis TAC125  
Pseudomonas aeruginosa PA01  
Pseudomonas entomophila L48  
Pseudomonas fluorescens Pf-5  
Pseudomonas fluorescens Pf0-1  
Pseudomonas putida KT2440

*Pseudomonas syringae* DC3000  
*Pseudomonas syringae* pv B728a  
*Pseudomonas syringae* pv phaseolicola  
*Psychrobacter arcticum* 273-4  
*Psychrobacter cryohalolentis* K5  
*Saccharophagus degradans* 2-40  
*Salmonella enterica* Choleraesuis  
*Salmonella enterica* Paratyphi ATCC9150  
*Salmonella enterica* serovar Typhi CT18  
*Salmonella typhimurium* LT2 SGSC1412  
*Shewanella denitrificans* OS217  
*Shewanella oneidensis* MR-1  
*Shigella boydii* Sb227  
*Shigella dysenteriae* Sd197  
*Shigella flexneri* 2a 2457T  
*Shigella sonnei* Ss046  
*Sodalis glossinidius* str. morsitans  
*Thiomicrospira crunogena* XCL-2  
*Vibrio cholerae* El Tor N16961  
*Vibrio parahaemolyticus* RIMD 2210633  
*Vibrio vulnificus* CMCP6  
*Wigglesworthia glossinidia* brevipalpis  
*Xanthomonas axonopodis* pv. citri 306  
*Xanthomonas campestris* 8004  
*Xanthomonas campestris* pv. armoraciae 756C  
*Xanthomonas campestris* pv. campestris ATCC33913  
*Xanthomonas campestris* pv. vesicatoria str. 85-10  
*Xanthomonas campestris* pv. vesicatoria str. 85-10  
*Xanthomonas oryzae* KACC10331  
*Xanthomonas oryzae* pv. oryzae MAFF 311018  
*Xanthomonas oryzae* pv. oryzicola BLS256  
*Xylella fastidiosa* Temecula1  
*Xylella fastidiosa* Temecula1  
*Yersinia pestis* biovar Medievalis 91001  
*Yersinia pseudotuberculosis* IP32953
